# Supplementary material
Source: MDPI journal article supplement (https://www.mdpi.com/1424-2818/11/12/228)
Supplement: s1 [file s1]

Table S1: Results of a linear model with arcsine square-root transformed fertilisation success as the response variable, against particle size (size class) and concentration as explanatory variables. “\*” denotes significance at the  $\alpha = 0.05$  level.

|                                  | df | Sum Sq  | Mean Sq  | F value | p value  |
|----------------------------------|----|---------|----------|---------|----------|
| <b>Size Class</b>                | 6  | 0.40612 | 0.067686 | 2.4451  | 0.03152* |
| <b>Concentration</b>             | 4  | 0.22041 | 0.055103 | 1.9905  | 0.10335  |
| <b>Size Class: Concentration</b> | 6  | 0.17902 | 0.029837 | 1.0778  | 0.38237  |
| <b>Residuals</b>                 | 84 | 2.32532 | 0.027682 |         |          |

Table S2: Results of a linear model with square-root transformed embryo abnormality ratio as the response variable, against particle size (size class) and concentration as explanatory variables. “\*” denotes significance at the  $\alpha = 0.05$  level.

|                                  | df | Sum Sq  | Mean Sq  | F value | p value                 |
|----------------------------------|----|---------|----------|---------|-------------------------|
| <b>Size Class</b>                | 6  | 0.55406 | 0.092343 | 6.7207  | 7.732e <sup>-06</sup> * |
| <b>Concentration</b>             | 4  | 0.07440 | 0.018599 | 1.3537  | 0.2570                  |
| <b>Size Class: Concentration</b> | 6  | 0.06922 | 0.022536 | 0.8396  | 0.5429                  |
| <b>Residuals</b>                 | 84 | 1.15417 | 0        |         |                         |

Table S3: Results of a linear model with square-root transformed settlement success as the response variable, against particle size (size class) and concentration as explanatory variables. No significance found.

|                                  | df  | Sum Sq  | Mean Sq   | F value | p value |
|----------------------------------|-----|---------|-----------|---------|---------|
| <b>Size Class</b>                | 6   | 0.00575 | 0.0009581 | 0.0723  | 0.9985  |
| <b>Concentration</b>             | 4   | 0.04000 | 0.0100008 | 0.7550  | 0.5556  |
| <b>Size Class: Concentration</b> | 6   | 0.13155 | 0.0219248 | 1.6551  | 0.1329  |
| <b>Residuals</b>                 | 237 | 3.13951 | 0.0132469 |         |         |
